CORRECTION

# Correction: Effects of Low Dose Metformin on Metabolic Traits in Clozapine-Treated Schizophrenia Patients: An Exploratory Twelve-Week Randomized, Double-Blind, Placebo-Controlled Study

Chih-Chiang Chiu, Mong-Liang Lu, Ming-Chyi Huang, Po-Yu Chen, Yen-Kuang Lin, Shih-Ku Lin, Chun-Hsin Chen

There are errors in the author affiliations. The affiliations should appear as shown here:

Chih-Chiang Chiu<sup>1,2</sup>, Mong-Liang Lu<sup>2,3</sup>, Ming-Chyi Huang<sup>1,2</sup>, Po-Yu Chen<sup>1,4</sup>, Yen-Kuang Lin<sup>5</sup>, Shih-Ku Lin<sup>1,2</sup>, Chun-Hsin Chen<sup>2,3</sup>

**1** Department of Psychiatry, Taipei City Psychiatric Center, Taipei City Hospital, Taipei, Taiwan, **2** Department of Psychiatry, School of Medicine, College of Medicine, Taipei Medical University, Taipei, Taiwan, **3** Department of Psychiatry, Wan Fang Hospital, Taipei Medical University, Taipei, Taiwan, **4** Graduate Institute of Medical Science, School of Medicine, Taipei Medical University, Taipei, Taiwan, **5** Biostatistics Center, Taipei Medical University, Taipei, Taiwan

## Reference

1. Chiu C- C, Lu M- L, Huang M- C, Chen P- Y, Lin Y- K, Lin S- K, et al. (2016) Effects of Low Dose Metformin on Metabolic Traits in Clozapine-Treated Schizophrenia Patients: An Exploratory Twelve-Week Randomized, Double-Blind, Placebo-Controlled Study. PLoS ONE 11(12): e0168347. <https://doi.org/10.1371/journal.pone.0168347> PMID: 27973619

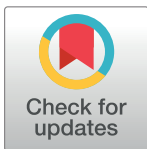

## OPEN ACCESS

**Citation:** Chiu C-C, Lu M-L, Huang M-C, Chen P-Y, Lin Y-K, Lin S-K, et al. (2018) Correction: Effects of Low Dose Metformin on Metabolic Traits in Clozapine-Treated Schizophrenia Patients: An Exploratory Twelve-Week Randomized, Double-Blind, Placebo-Controlled Study. PLoS ONE 13(2): e0193315. <https://doi.org/10.1371/journal.pone.0193315>

**Published:** February 16, 2018

**Copyright:** © 2018 Chiu et al. This is an open access article distributed under the terms of the [Creative Commons Attribution License](https://creativecommons.org/licenses/by/4.0/), which permits unrestricted use, distribution, and reproduction in any medium, provided the original author and source are credited.
